# Supplementary material for: The Anti-Inflammatory Effect of Callicarpa nudiflora Extract on H. Pylori-Infected GES-1 Cells through the Inhibition of ROS/NLRP3/Caspase-1/IL-1β Signaling Axis
Source: Hindawi journal article supplement (doi:10.1155/2022/5469236), 2022-07-15
Supplement: f1 [file 5469236.f1.pdf]

深圳仙湖植物园  
植物标本馆 (SZG)

Shenzhen Fairy Lake Botanical Herbarium

采集人: 张寿洲、李良等人

采集号: 3748

采集日期: 2016-7-20

采集地点: 海南省五指山

环境: 路旁

海拔: 500 米

植物性状: 灌木

胸径:

体高:

叶:

花: 紫红色

果实:

树皮:

中文名: 红紫珠

科名: 马鞭草科

拉丁名: *Callicarpa Rubella* Lindl.

附记:

标本份数: 2

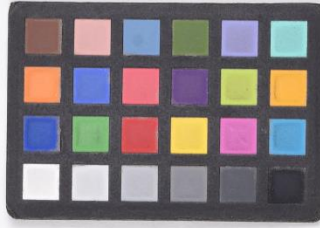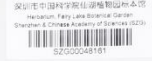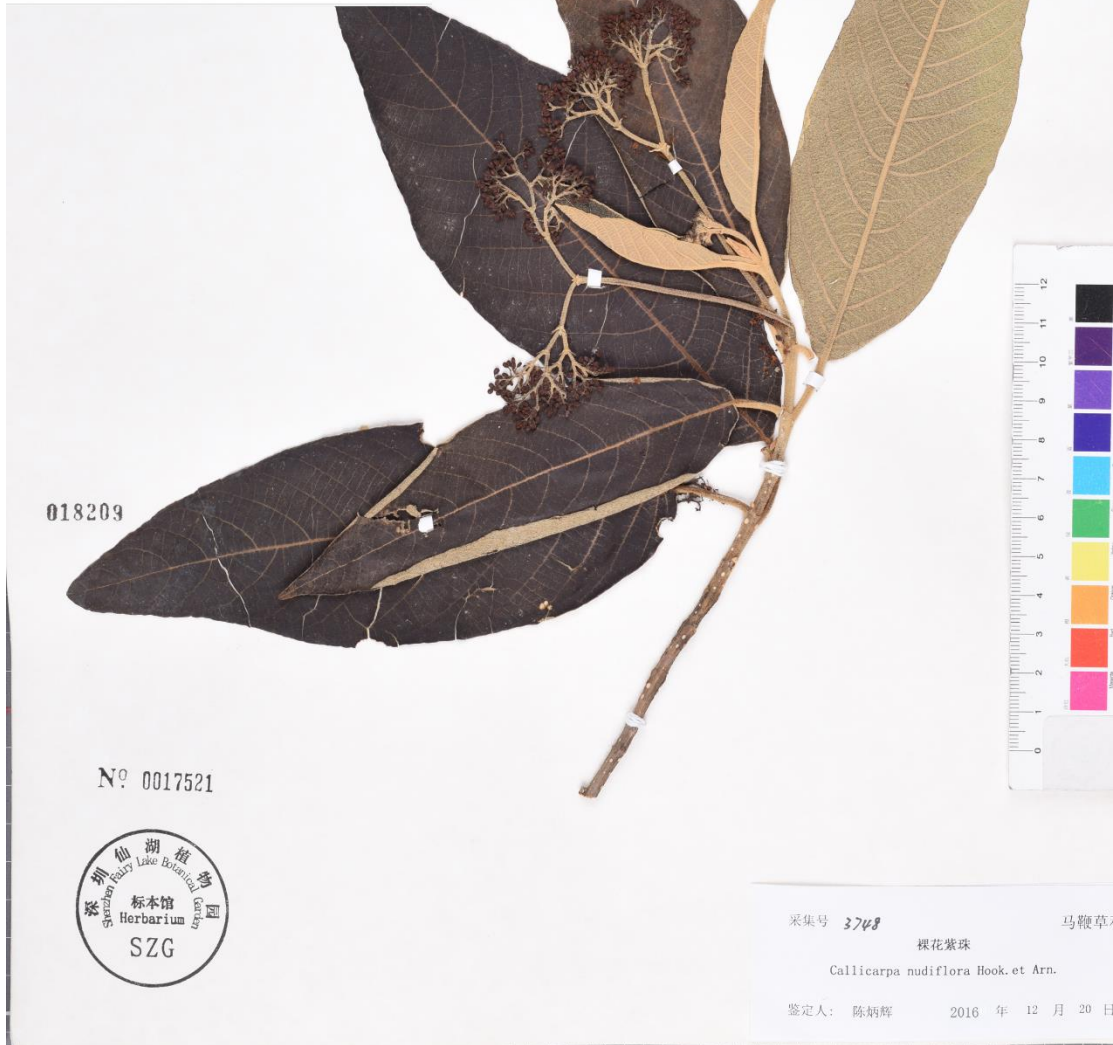

018209

N<sup>o</sup> 0017521

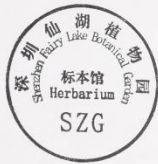

采集号 3748

裸花紫珠

马鞭草科

*Callicarpa nudiflora* Hook. et Arn.

鉴定人: 陈炳辉

2016 年 12 月 20 日

Supplementary Figure 1 The plant specimen picture of *Callicarpa nudiflora*.

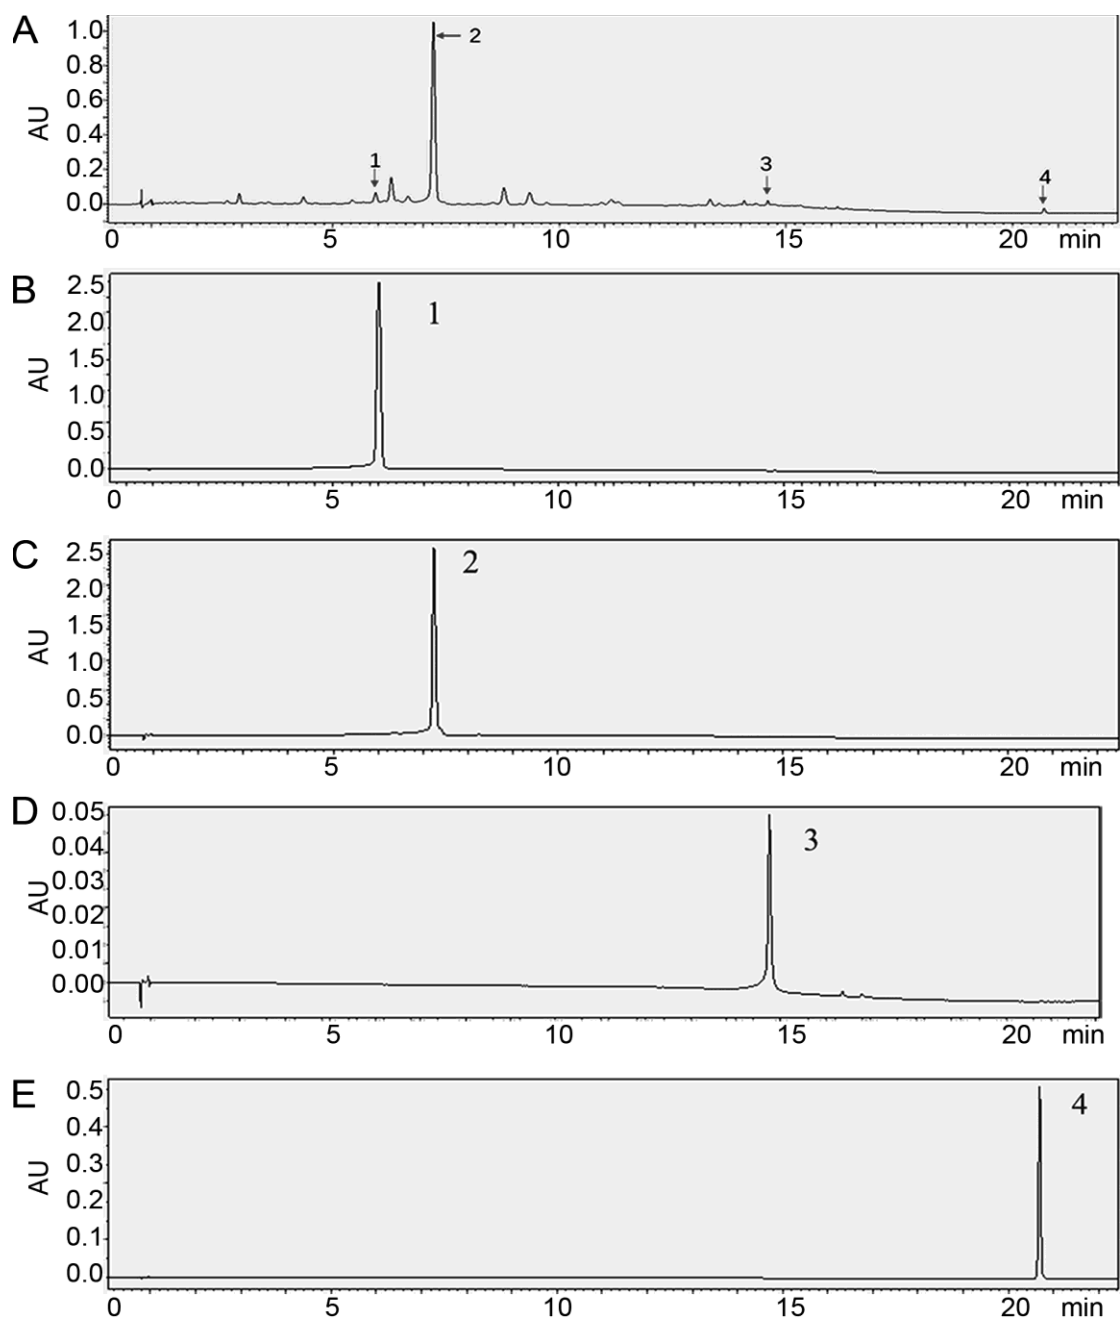

Supplementary Figure 2 The UPLC spectrum of four main compounds.

(A) 1: Forsythoside B (0.98%), 2: Acteoside (33.26%), 3: Luteolin (0.33%),

4: 5,4'-dihydroxy-3,7,3'-trimethoxyflavone (0.42%).

(B-E) The UPLC spectrum of Forsythoside B. (B) Acteoside, (C) Luteolin,

(D) 4: 5,4'-dihydroxy-3,7,3'-trimethoxyflavone, (E) standard sample.

Supplementary Table 1 Identification of chemical constituents of *Callicarpa nudiflora* by UPLC-ESI-Q-TOF-MS

| No. | T <sub>R</sub><br>(min) | Identification                                | Negative<br>(m/z) | ion<br>ppm | Positive<br>(m/z) | ion<br>ppm | Molecular<br>formula                            | Molecular<br>weight<br>(Da) | MS/MS (m/z)                                                                 | Chemical<br>type |
|-----|-------------------------|-----------------------------------------------|-------------------|------------|-------------------|------------|-------------------------------------------------|-----------------------------|-----------------------------------------------------------------------------|------------------|
| 1   | 2.05*                   | catalpol                                      | 397.0904          | -0.7       | -                 | -          | C <sub>15</sub> H <sub>22</sub> O <sub>10</sub> | 362.1213                    | -                                                                           | I                |
| 2   | 5.16                    | caffeic acid                                  | 179.0347          | -1.7       | -                 | -          | C <sub>9</sub> H <sub>8</sub> O <sub>4</sub>    | 180.0423                    | -                                                                           | PA               |
| 3   | 5.35                    | 8-acetyl-harpagide                            | 405.1399          | -0.9       | 429.1356          | -1.2       | C <sub>17</sub> H <sub>26</sub> O <sub>11</sub> | 406.1475                    | (-)165.0552<br>(+)149.0578                                                  | I                |
| 4   | 5.82                    | 6'- <i>O</i> - <i>trans</i> -caffeoylcatalpol | 523.1456          | -0.2       | 547.1423          | 0.1        | C <sub>24</sub> H <sub>28</sub> O <sub>13</sub> | 524.1530                    | (-)323.0765,161.0241<br>(+)325.0899,163.0369,135.0416                       | I                |
| 5   | 6.06*                   | verminoside                                   | 523.1456          | -0.3       | 547.1399          | -2.3       | C <sub>24</sub> H <sub>28</sub> O <sub>13</sub> | 524.1530                    | (-)323.0766,179.0345,161.0242<br>(+)163.0380                                | I                |
| 6   | 6.56                    | β-hydroxyacteoside                            | 639.1930          | -0.1       | 663.1890          | -0.5       | C <sub>24</sub> H <sub>28</sub> O <sub>13</sub> | 524.1530                    | (-)475.1400,179.0347,161.0244,151.0400<br>(+)163.0383, 135.0421             | P                |
| 7   | 6.67                    | β-hydroxyacteoside                            | 639.1929          | -0.2       | 663.1893          | -0.2       | C <sub>29</sub> H <sub>36</sub> O <sub>16</sub> | 640.2003                    | (-)529.1556,475.1447,179.0347,161.0243,<br>133.0291<br>(+)163.0385,135.0438 | P                |
| 8   | 7.18*                   | 6-Hydroxyluteolin-7- <i>O</i> -β-D-glucoside  | 463.0877          | -1.0       | 465.1013          | -1.5       | C <sub>21</sub> H <sub>20</sub> O <sub>12</sub> | 464.0955                    | (-)301.0346<br>(+)303.0492, 301.0330                                        | F                |
| 9   | 7.88                    | 6- <i>O</i> - <i>trans</i> -feruloylcatalpol  | 537.1604          | -1.7       | 561.1559          | -2.0       | C <sub>25</sub> H <sub>30</sub> O <sub>13</sub> | 538.1686                    | (-)285.0391, 175.0394<br>(+)449.1033,287.0542,177.0543,163.0382,133.0855    | I                |
| 10  | 8.04*                   | forsythoside B                                | 755.2402          | -0.3       | 779.2338          | -3.1       | C <sub>34</sub> H <sub>44</sub> O <sub>19</sub> | 756.2477                    | (-)593.2084,179.0344,161.0242,135.0446<br>(+)163.0383,135.0449              | P                |
| 11  | 8.37*                   | nudifloside                                   | 523.1450          | -1.3       | 547.1415          | -0.8       | C <sub>24</sub> H <sub>28</sub> O <sub>13</sub> | 524.1530                    | (-)361.0918,161.0240,133.0290                                               | I                |

|    |       |                                              |          |      |          |      |                                                 |          |                                                                             |   |
|----|-------|----------------------------------------------|----------|------|----------|------|-------------------------------------------------|----------|-----------------------------------------------------------------------------|---|
| 12 | 8.60* | luteoloside                                  | 447.0928 | -1.1 | 449.1070 | -0.9 | C <sub>21</sub> H <sub>20</sub> O <sub>11</sub> | 448.1006 | (+)363.1072,163.0383,135.0427<br>(-)285.0397                                | F |
| 13 | 8.73* | lutidin-7-O-neohesperido<br>side             | 593.1516 | 0.3  | 595.1652 | -0.6 | C <sub>27</sub> H <sub>30</sub> O <sub>15</sub> | 594.1585 | (+)287.0548,153.0166<br>(-)285.0395                                         | F |
| 14 | 8.77* | acteoside                                    | 623.1979 | -0.3 | 647.1945 | -0.1 | C <sub>29</sub> H <sub>36</sub> O <sub>15</sub> | 624.2054 | (+)287.0541<br>(-)461.1660,315.1079,179.0346,161.0243,1<br>13.0242          | P |
| 15 | 9.52  | isoacteoside                                 | 623.1976 | -0.9 | 647.1939 | -0.7 | C <sub>29</sub> H <sub>36</sub> O <sub>15</sub> | 624.2054 | (+)163.0388,135.0436<br>(-)461.1656,315.1070,179.0345,161.0241,1<br>35.0446 | P |
| 16 | 9.70  | parvifloroside B                             | 623.1978 | -0.5 | 647.1935 | -1.2 | C <sub>29</sub> H <sub>36</sub> O <sub>15</sub> | 624.2054 | (+)163.0384,135.0430<br>(-)461.1651,179.0345,161.0241,135.0444,1<br>33.0289 | P |
| 17 | 9.96* | lutidin-4'-O-β-D-<br>glucoside               | 447.0928 | -1.1 | 449.1063 | -1.6 | C <sub>21</sub> H <sub>20</sub> O <sub>11</sub> | 448.1006 | (+)163.0375,135.0419<br>(-)285.0400, 133.0288                               | F |
| 18 | 10.42 | chrysoeriol-7-O-β-D-gluc<br>oside            | 461.1082 | -1.6 | 463.1215 | -2.0 | C <sub>22</sub> H <sub>22</sub> O <sub>11</sub> | 462.1162 | (+)287.0541<br>(-)255.0293                                                  | F |
| 19 | 10.51 | 10-O-trans-p-coumaroylg<br>eniposidic acid   | 519.1506 | -0.4 | -        | -    | C <sub>25</sub> H <sub>28</sub> O <sub>12</sub> | 520.1581 | (+)301.0687<br>(-)339.0867,313.1072,163.0395,161.0238                       | I |
| 20 | 10.62 | luteolin-3'-O-β-D-glucop<br>yranoside        | 447.0932 | -0.2 | 449.1066 | -1.2 | C <sub>21</sub> H <sub>20</sub> O <sub>11</sub> | 448.1006 | (-)285.0401, 133.0291<br>(+)287.0544,153.0166                               | F |
| 21 | 11.22 | 6'-O-trans-p-coumaroyl-8<br>-epiloganic acid | 521.1656 | -1.5 | 545.1618 | -1.2 | C <sub>25</sub> H <sub>30</sub> O <sub>12</sub> | 522.1737 | (+)179.0689,165.0536<br>(-)297.1125, 195.0654,163.0396                      | I |
| 22 | 11.68 | martynoside                                  | 651.2291 | -0.5 | 675.2249 | -1.0 | C <sub>31</sub> H <sub>40</sub> O <sub>15</sub> | 652.2367 | (-)175.0396,161.0238,160.0161<br>(+)195.0632,177.0543,163.0736              | P |

|    |        |                                         |          |      |          |      |                                                |          |                                              |   |
|----|--------|-----------------------------------------|----------|------|----------|------|------------------------------------------------|----------|----------------------------------------------|---|
| 23 | 12.06* | luteolin                                | 285.0401 | -1.3 | 287.0549 | -0.4 | C <sub>15</sub> H <sub>10</sub> O <sub>6</sub> | 286.0477 | (-)179.0344,133.0291<br>(+)339.1055          | F |
| 24 | 14.02* | 5,4'-dihydroxy-3,7,3'-trimethoxyflavone | 343.0817 | -1.9 | 345.0962 | -0.7 | C <sub>18</sub> H <sub>16</sub> O <sub>7</sub> | 344.0896 | (-)328.0577,313.0347<br>(+)330.0726,315.0487 | F |

\*: standard compounds, I: iridoid glycosides, F: flavanones, P: phenylethanoid glycoside, PA: phenylpropionic acid
